# Supplementary material for: Crystalline/amorphous c-NiMo/a-NiMoOx nanoarrays for urea-assisted energy-saving H2 production in alkaline seawater
Source: Royal Society of Chemistry journal article supplement (doi:10.1039/d4gc05042h), 2024-11-06
Supplement: d4gc05042h1.pdf [file d4gc05042h1.pdf]

## Electronic Supplementary Information

# Crystalline/amorphous c-NiMo/a-NiMoO<sub>x</sub> nanoarrays for urea-assisted energy-saving H<sub>2</sub> production in alkaline seawater

Dongxue Guo<sup>\*a</sup>, Yi Ping<sup>b</sup>, Chuanjiao Wang<sup>b</sup>, Changan Hou<sup>b</sup>, Danhong Wang<sup>\*b</sup>

<sup>a</sup>Academy of National Food and Strategic Reserves Administration, Beijing 100037,  
China.

<sup>b</sup>TKL of Metal and Molecule Based Material Chemistry, School of Materials Science  
and Engineering, Nankai University, Tianjin 300350, China.

\*Corresponding author.

Email: gdx@ags.ac.cn; dhwang@nankai.edu.cn

## **Experimental section**

### **Materials**

All the chemicals were used as received without further purification. Nickel nitrate hexahydrate ( $\text{Ni}(\text{NO}_3)_2 \cdot 6\text{H}_2\text{O}$ ), potassium hydroxide (KOH) and hydrochloric acid (HCl, ca. 36.0 ~ 38.0 % solution in water) were purchased from Aladdin Industrial Co., Ltd. Ammonium molybdate tetrahydrate ( $(\text{NH}_4)_6\text{Mo}_7\text{O}_{24} \cdot 4\text{H}_2\text{O}$ ) and urea ( $\text{CO}(\text{NH}_2)_2$ ) were purchased from Shanghai Macklin Biochemical Industrial Co., Ltd. Commercial Ni foam (thickness of 1.0 mm, bulk density  $0.32 \text{ g cm}^{-2}$ , Tianjin Ailian Co., Ltd.) was used as a conductive substrate to grow catalyst. Ultrapure Milli-Q water ( $18.25 \text{ M}\Omega \cdot \text{cm}$ ) was used in all experiments. Natural seawater was collected from the East China Sea with a pH of about 8.26 and used directly without further purification.

### **Characterization**

Powder X-ray diffraction (PXRD) spectra were recorded on a Rigaku Smart Lab powder diffractometer equipped with Cu  $K\alpha$  radiation ( $\lambda = 1.5418 \text{ \AA}$ ). The morphology of the samples was characterized by a field emission scanning electron microscopy (FE-SEM) (model JSM-7800F). Transmission electron microscopy (TEM) with high resolution mode (HRTEM) and selected area electron diffraction (SAED) pattern were acquired with JEM-2800 (Japan) operating at an accelerating voltage of 200 kV. The elemental mapping of the samples was performed by energy-dispersive X-ray spectroscope (EDX) accessory attached to the TEM. The inductively-coupled plasma optical emission spectrometry (ICP-OES) was performed on Agilent 5110. X-ray photoelectron spectroscopy (XPS) was investigated by using a Thermo ESCALAB

250XI X-ray photoelectron spectrometer. Raman spectra were obtained using a SR-500I-A Raman spectrometer, with an argon ion laser (785 nm) as the excitation light source. The wettability of the electrodes surface was characterized by surveying the contact angles. The X-ray absorption fine structure (XAFS) measurements were tested at the SPring-8 BL14B2 in Japan Synchrotron Radiation Research Institute (JASRI). XAFS data were tested by a fixed-exit double-crystal Si (111) monochromator.

### **Electrochemical measurements**

Electrochemical measurements were carried out by an electrochemical workstation (Ivium V53517, Netherlands) using a standard three-electrode system in 1.0 M KOH, 1.0 M KOH + 0.33 M Urea, 1 M KOH + 0.33 M Urea + seawater, respectively. The working electrode was the c-NiMo/a-NiMoO<sub>x</sub> (and other control samples) with a geometric area of 0.49 cm<sup>2</sup>. The Hg/HgO (1.0 M KOH) was used as the reference electrode. A Pt plate with an area of 1 cm<sup>2</sup> was used as the counter electrode in OER and UOR, while a graphite rod acted as a counter electrode in HER. All the electrochemical measurements were corrected using 90% iR compensation and calibrated to the reversible hydrogen electrode (RHE) using the Nernst equation:  $E_{\text{RHE}} = E_{\text{Hg/HgO}} + 0.098 \text{ V} + 0.059 \times \text{pH}$ . Linear sweep voltammetry (LSV) was conducted with a scan rate of 2 mV s<sup>-1</sup>. The electrochemical impedance spectroscopy (EIS) was recorded in the region of 100 kHz-0.1 Hz at an amplitude of 10 mV. The electrochemical active surface area (ECSA) was calculated as the following equation:  $\text{ECSA} = C_{\text{dl}}/C_s$ . The  $C_{\text{dl}}$  is the electrochemical double-layer capacitance obtained from CV cycles. The general specific capacitance of  $C_s$  in 1.0 M KOH is usually considered

as a constant (0.04 mF cm<sup>-2</sup>) based on typical reported values. The faradaic efficiency was calculated from the ratio of the produced and theoretical amounts of H<sub>2</sub> by a water drainage method. The overall urea-assisted seawater/freshwater electrolysis were carried out in a H-type electrolyzer cell with c-NiMo/a-NiMoO<sub>x</sub> as the anodic electrode and cathodic electrode, and an anion-exchange membrane as the separator.

### **DFT calculations**

We have employed the Vienna Ab Initio Simulation Package (VASP) to perform all the density functional theory (DFT) calculations within the generalized gradient approximation (GGA) using the PBE formulation.<sup>1-3</sup> We have chosen the projected augmented wave (PAW) potentials to describe the ionic cores and take valence electrons into account using a plane wave basis set with a kinetic energy cutoff of 450 eV.<sup>4,5</sup> Partial occupancies of the Kohn-Sham orbitals were allowed using the Gaussian smearing method and a width of 0.05 eV. The on-site corrections (DFT+U) has been applied to the d electrons of Ni atoms (U<sub>eff</sub> = 6.2 eV) and Mo atoms (U<sub>eff</sub> = 4.4 eV) and by the approach from Dudarev et al.<sup>6</sup> The electronic energy was considered self-consistent when the energy change was smaller than 10<sup>-5</sup> eV. A geometry optimization was considered convergent when the force change was smaller than 0.02 eV/Å. Grimme's DFT-D3 methodology was used to describe the dispersion interactions.<sup>7</sup>

The adsorption energy ( $E_{\text{ads}}$ ) of adsorbate A was defined as

$$E_{\text{ads}} = E_{A/\text{surf}} - E_{\text{surf}} - E_{A(\text{g})}$$

where  $E_{A/\text{surf}}$ ,  $E_{\text{surf}}$  and  $E_{A(\text{g})}$  are the energy of adsorbate A adsorbed on the polyimide, the energy of clean polyimide, and the energy of isolated A molecule in a cubic periodic

box with a side length of 20 Å and a 1×1×1 Monkhorst-Pack k-point grid for Brillouin zone sampling, respectively.

The free energy of a gas phase molecule or an adsorbate on the surface was calculated by the equation  $G = E + \text{ZPE} - TS$ , where E is the total energy, ZPE is the zero-point energy, T is the temperature in kelvin (298.15 K is set here), and S is the entropy.

### Supplementary Figures

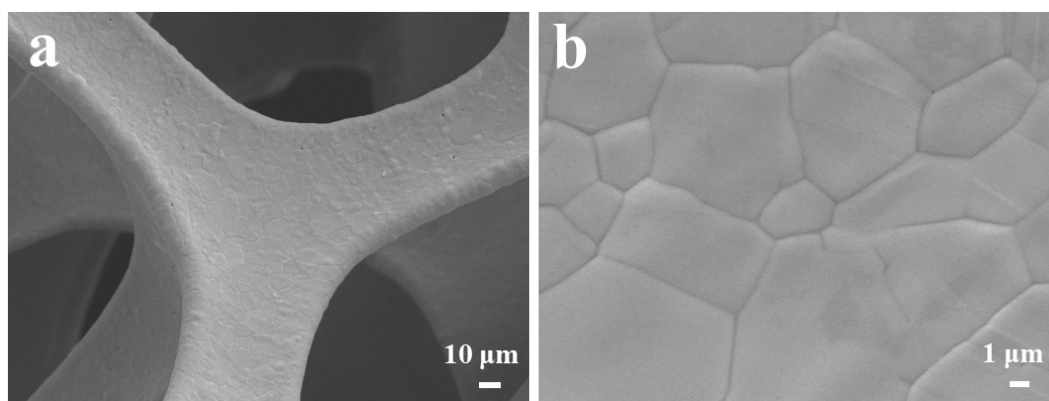

Figure S1. SEM images of (a) low magnification and (b) high magnification of bare Ni foam.

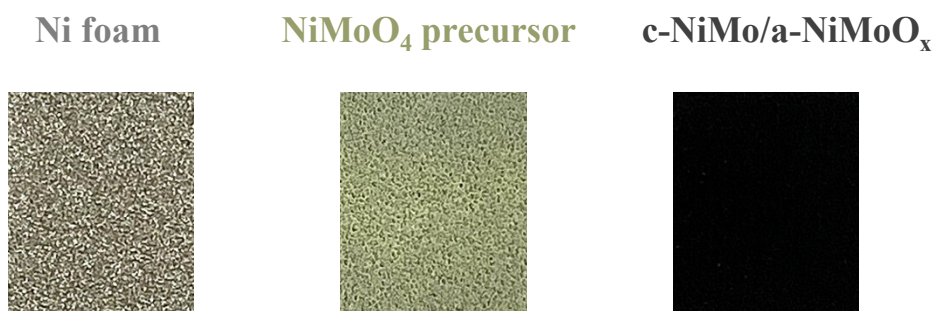

Figure S2. Optical photographs of Ni foam, NiMoO<sub>4</sub> precursor and c-NiMo/a-NiMoO<sub>x</sub> catalysts.

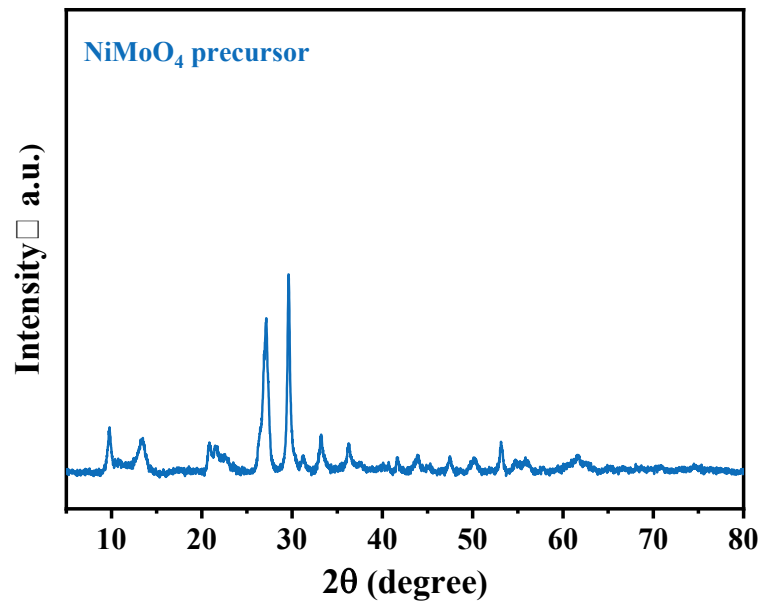

Figure S3. XRD pattern of NiMoO<sub>4</sub> precursor.

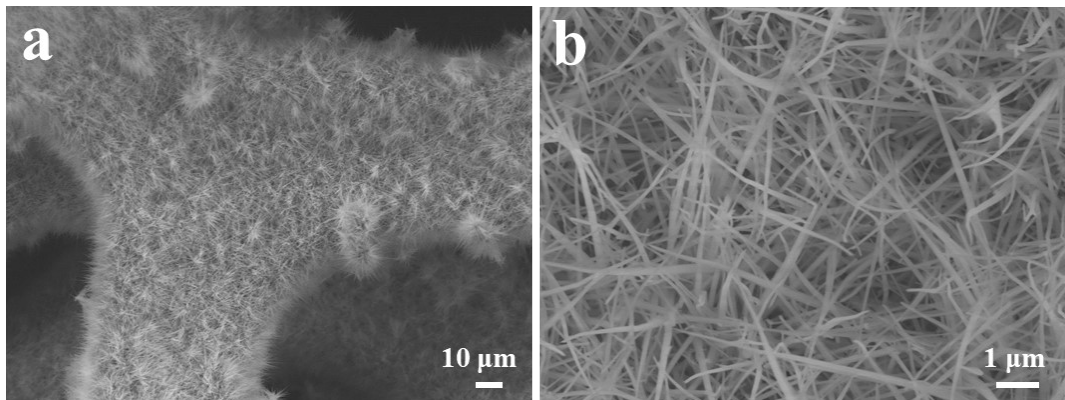

Figure S4. SEM images of (a) low magnification and (b) high magnification of NiMoO<sub>4</sub> precursor.

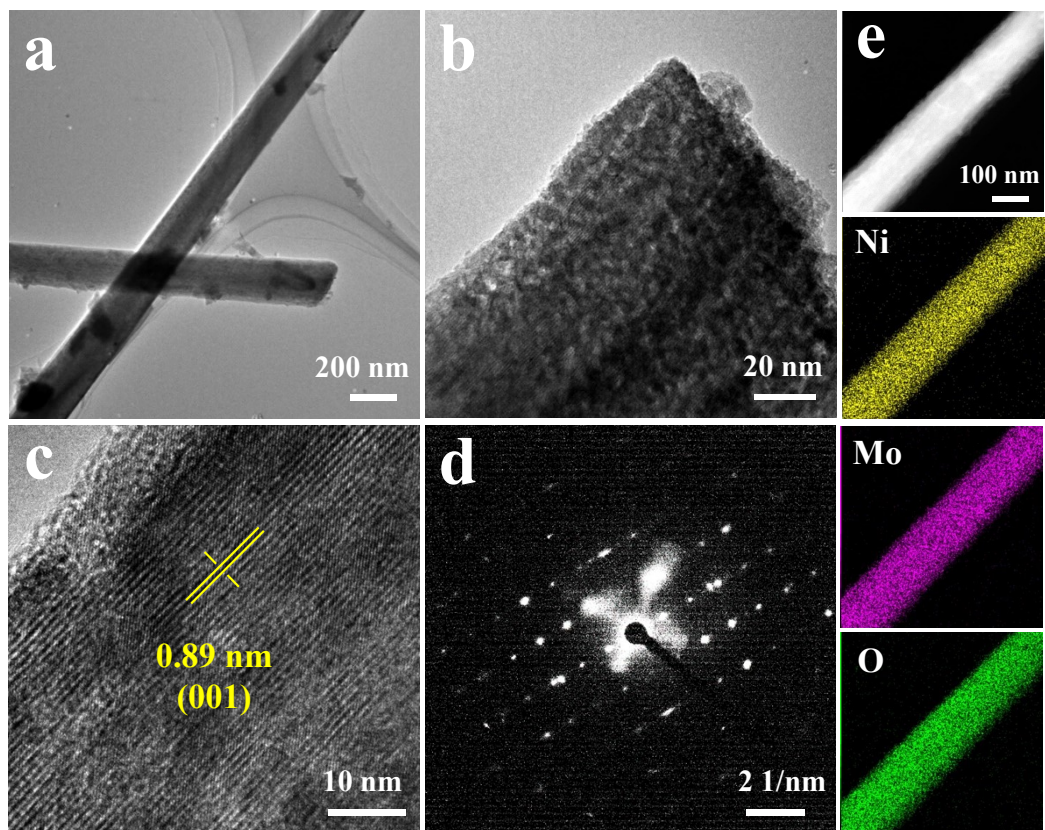

Figure S5 TEM, HRTEM image, HAADF-STEM image and corresponding elemental mappings of the NiMoO<sub>4</sub> precursor.

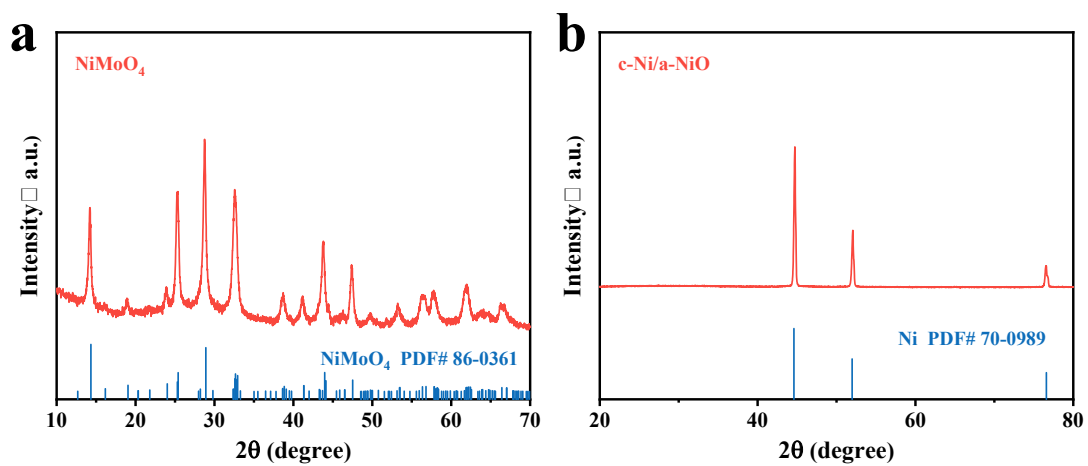

Figure S6. XRD patterns of (a) NiMoO<sub>4</sub> and (b) c-Ni/a-NiO.



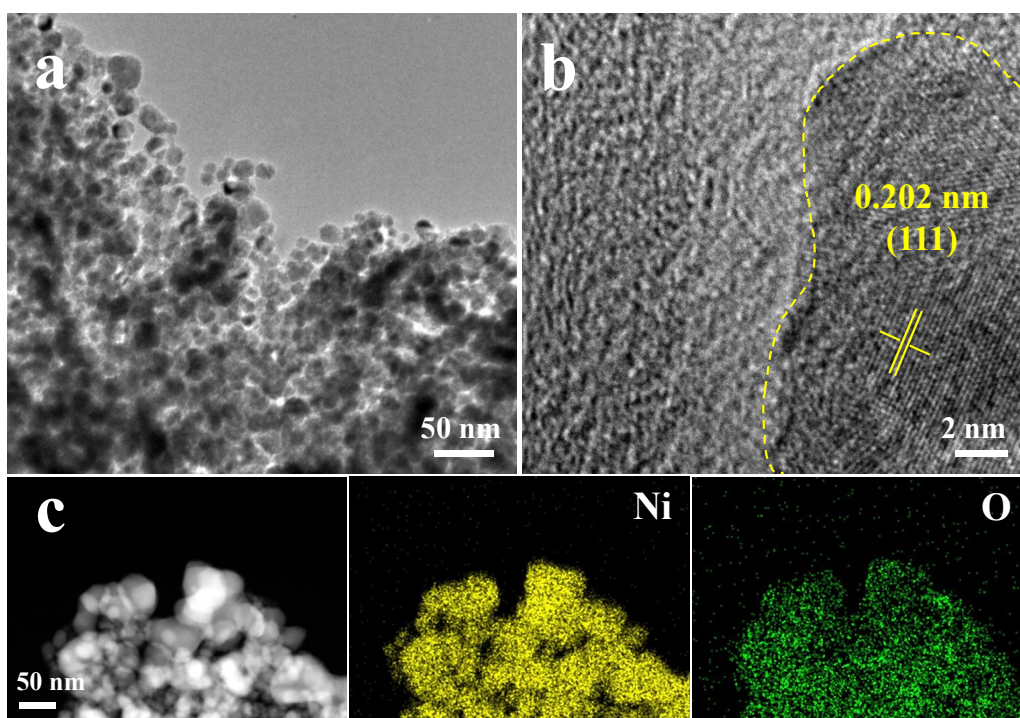

Figure S7. TEM, HRTEM image, HAADF-STEM image and corresponding elemental mappings of the c-Ni/a-NiO catalyst.

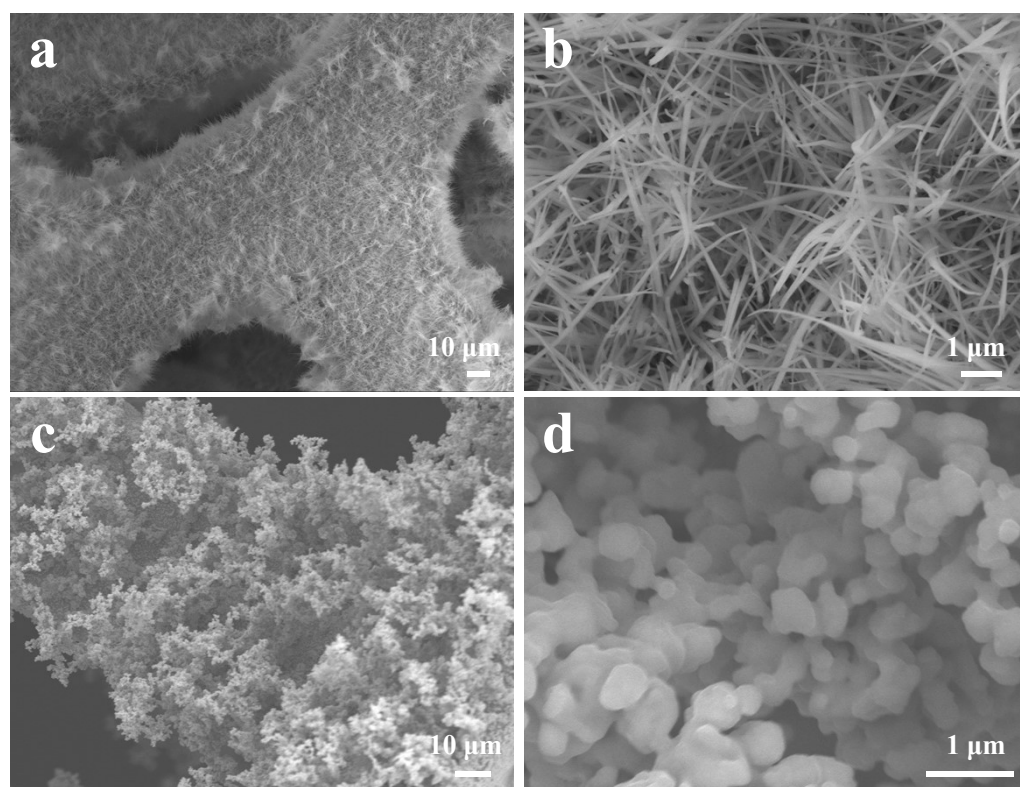

Figure S8. SEM images of (a, b) NiMoO<sub>4</sub> and (c, d) c-Ni/a-NiO.



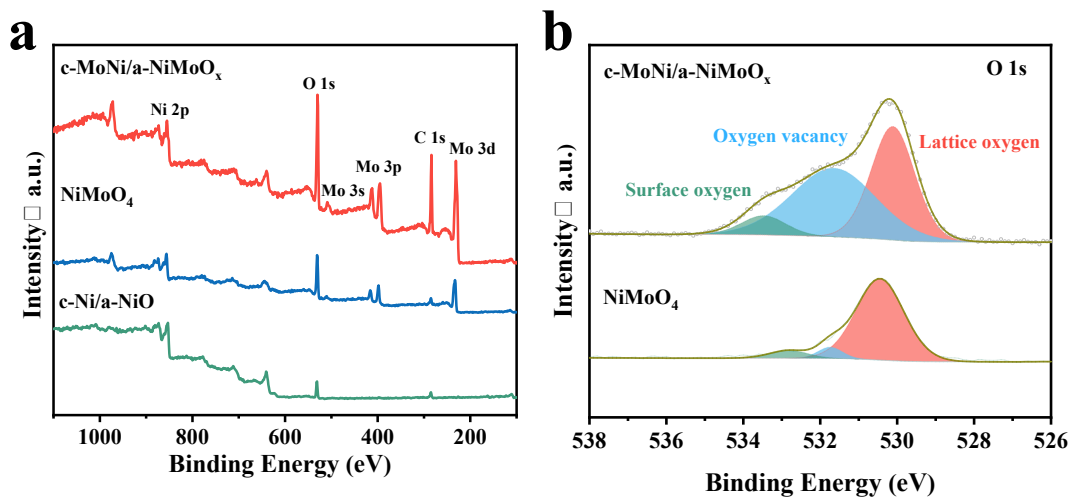

Figure S9. (a) XPS survey spectra of c-NiMo/a-NiMoO<sub>x</sub>, NiMoO<sub>4</sub> and c-Ni/a-NiO. (b) The high-resolution XPS spectra of O of the prepared catalysts.

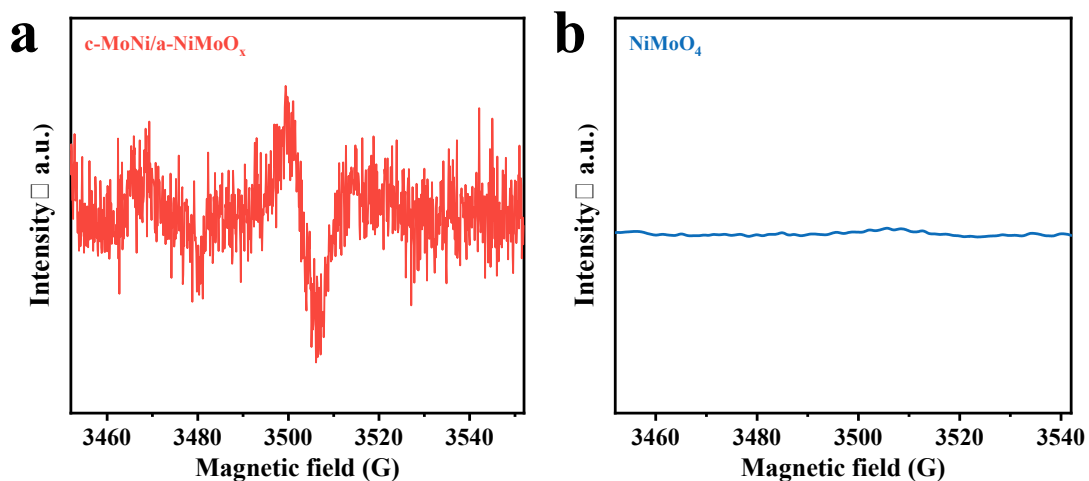

Figure S10. The narrow-band EPR spectra of c-NiMo/a-NiMoO<sub>x</sub> and NiMoO<sub>4</sub>.

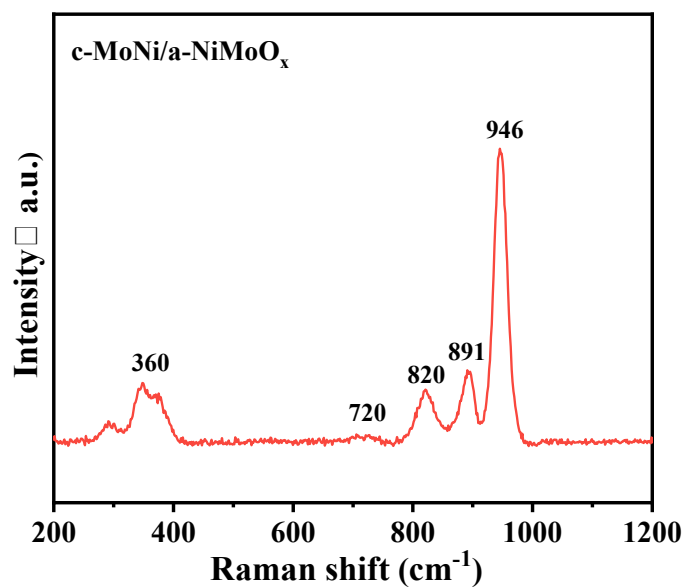

Figure S11. Raman spectra of c-MoNi/a-NiMoO<sub>x</sub>.

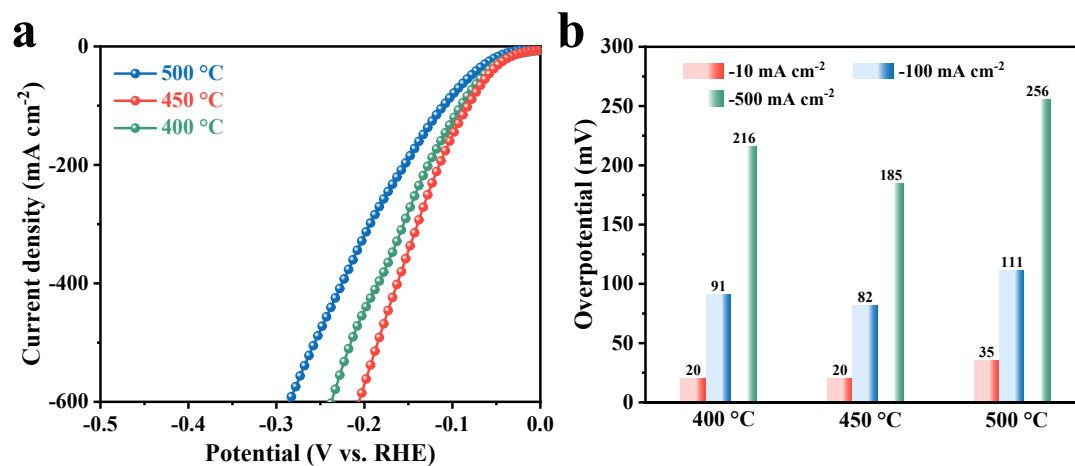

Figure S12. (a) LSV and (b) HER overpotentials at 10/100/500 mA cm<sup>-2</sup> for NiMoO<sub>4</sub> precursors annealed at different temperatures.

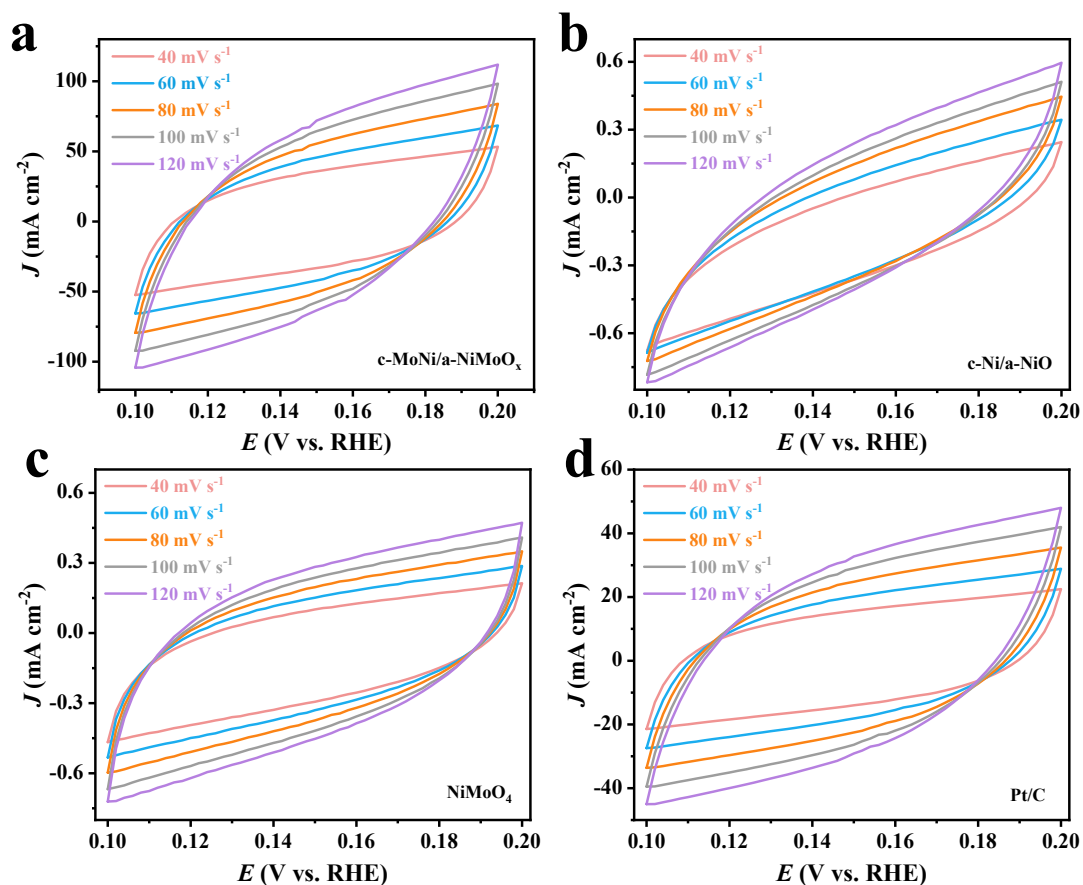

Figure S13. CV curves of (a) c-NiMo/a-NiMoO<sub>x</sub>, (b) c-Ni/a-NiO, (c) NiMoO<sub>4</sub> and (d) Pt/C in the non-faradaic region.

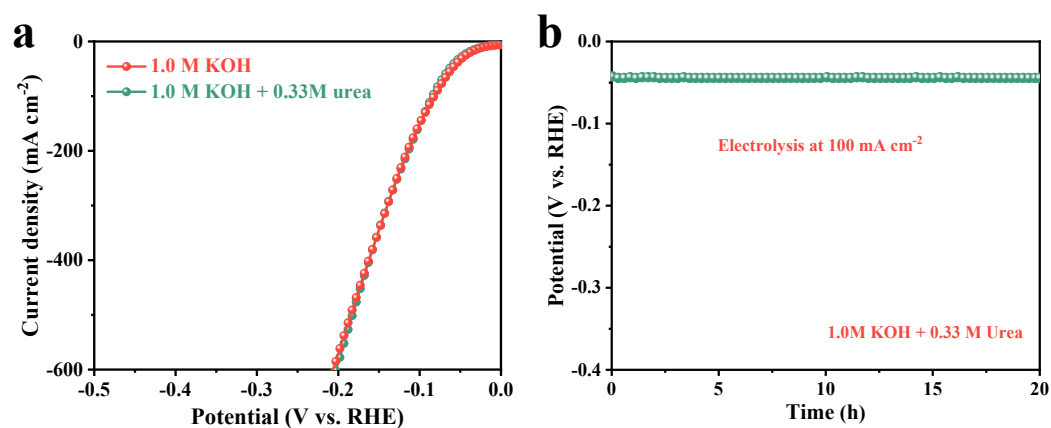

Figure S14. (a) HER polarization curves of c-MoNi/a-NiMoO<sub>x</sub> in 1.0 M KOH and 1.0 M KOH + 0.33 M Urea. (b) Chronopotentiometry test of c-MoNi/a-NiMoO<sub>x</sub> in 1.0 M KOH + 0.33 M Urea.

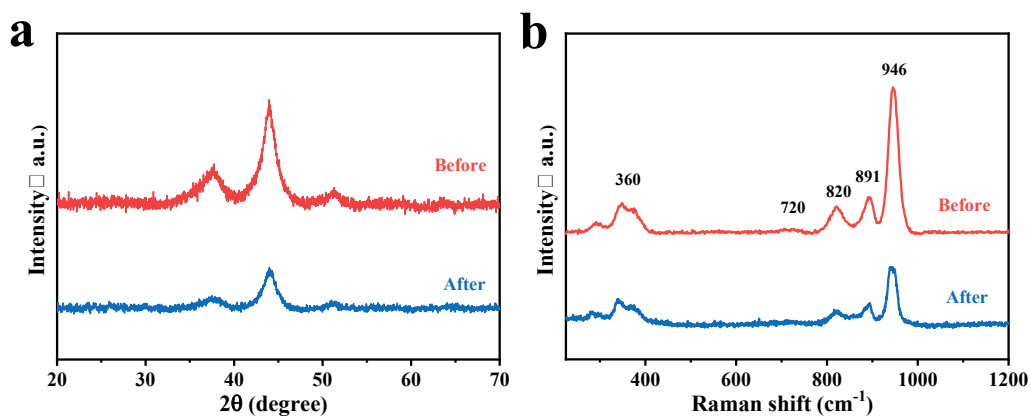

Figure S15. (a) XRD and (b) Raman patterns of c-NiMo/a-NiMoO<sub>x</sub> after HER test.

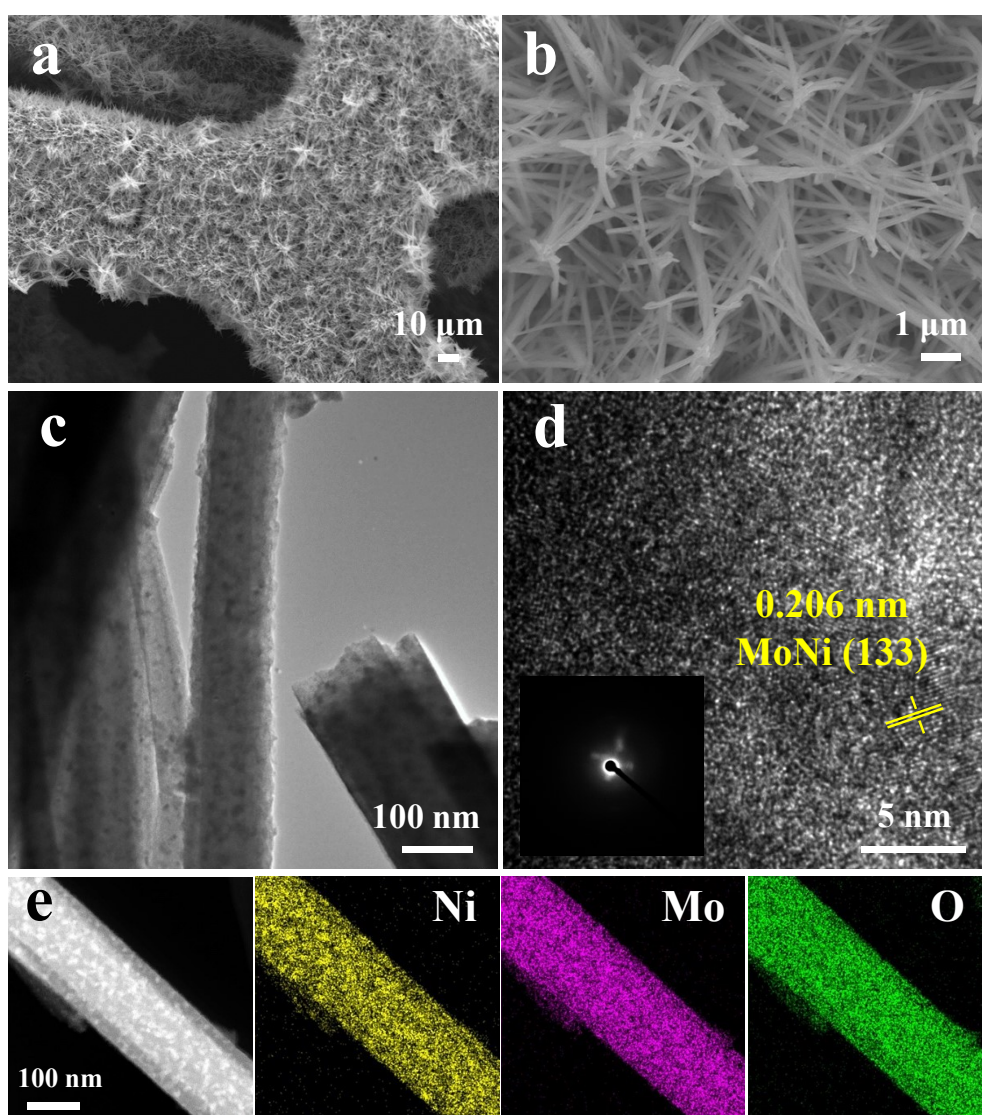

Figure S16. (a, b) SEM images, (c) TEM images, (d) HRTEM images, insets show the SAED pattern, (e) HAADF-STEM image and corresponding elemental mappings of the c-MoNi/a-NiMoO<sub>x</sub> after HER test.

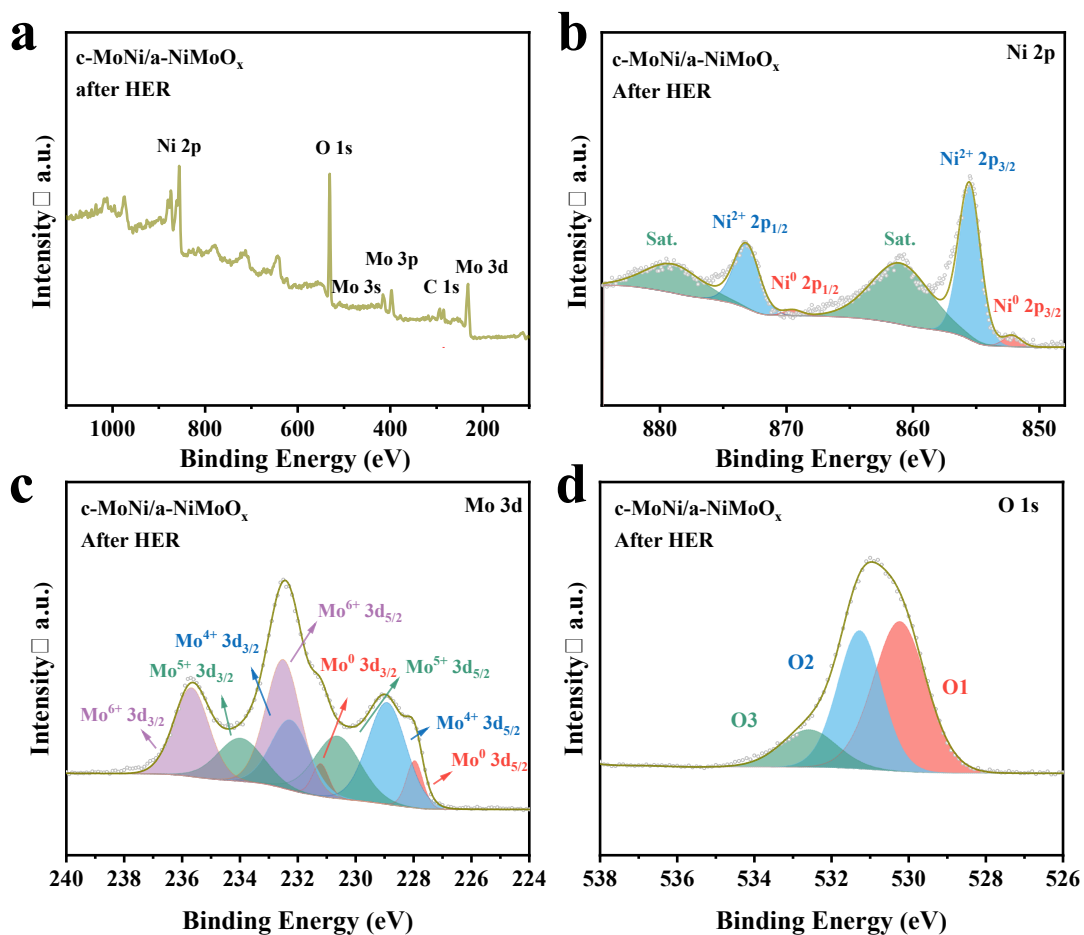

Figure S17. XPS survey spectra (a) and the high-resolution XPS spectra of (b) Ni 2p, (c) Mo 3d and (d) O 1s of c-NiMo/a-NiMoO<sub>x</sub> after HER test.

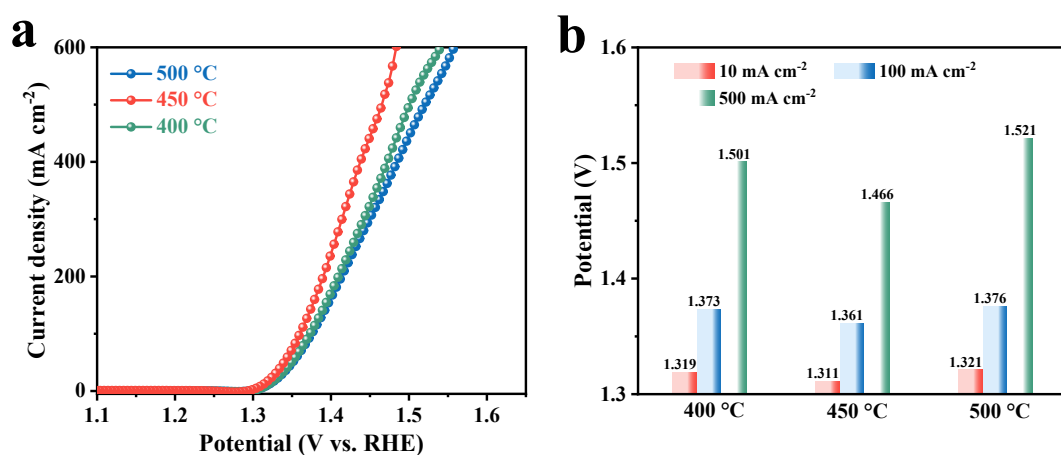

Figure S18. (a) LSV and (b) UOR potentials at 10/100/500 mA cm<sup>-2</sup> for precursors annealed at different temperatures.

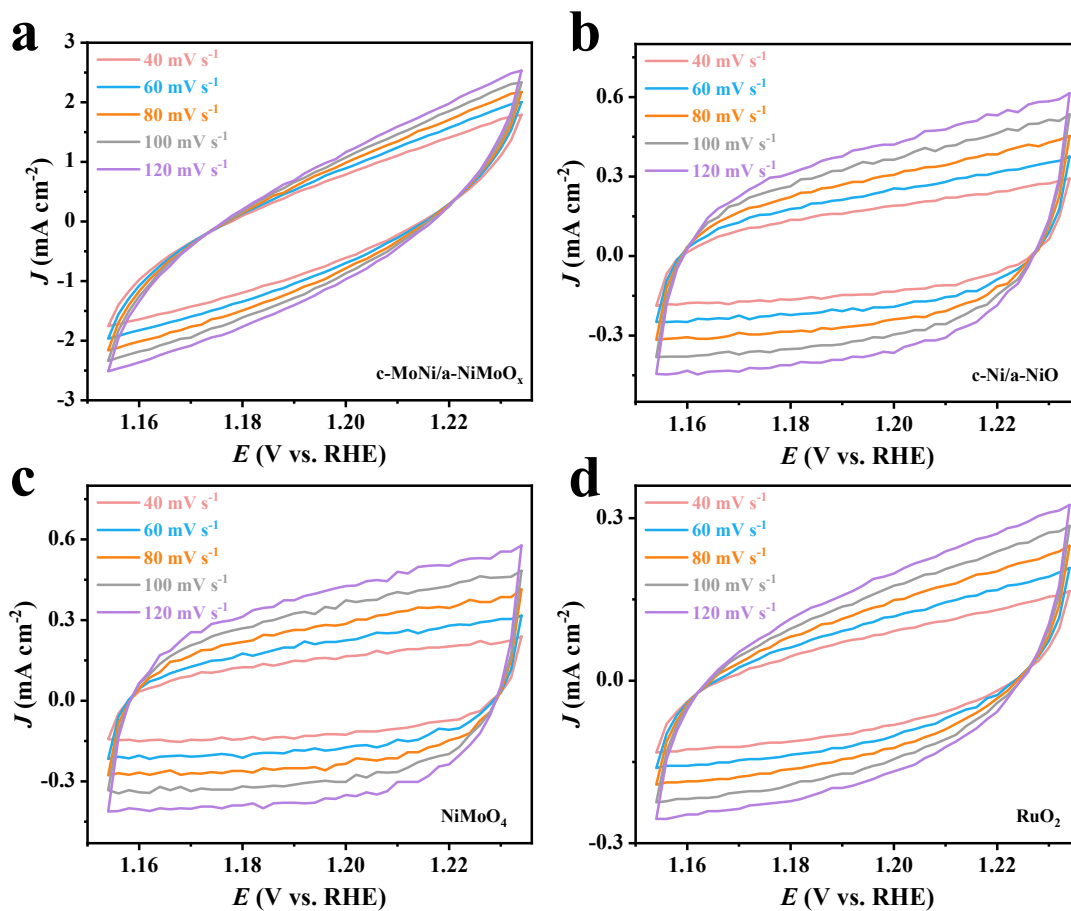

Figure S19. CV curves of (a) c-NiMo/a-NiMoO<sub>x</sub>, (b) c-Ni/a-NiO, (c) NiMoO<sub>4</sub> and (d) Pt/C in the non-faradaic region.

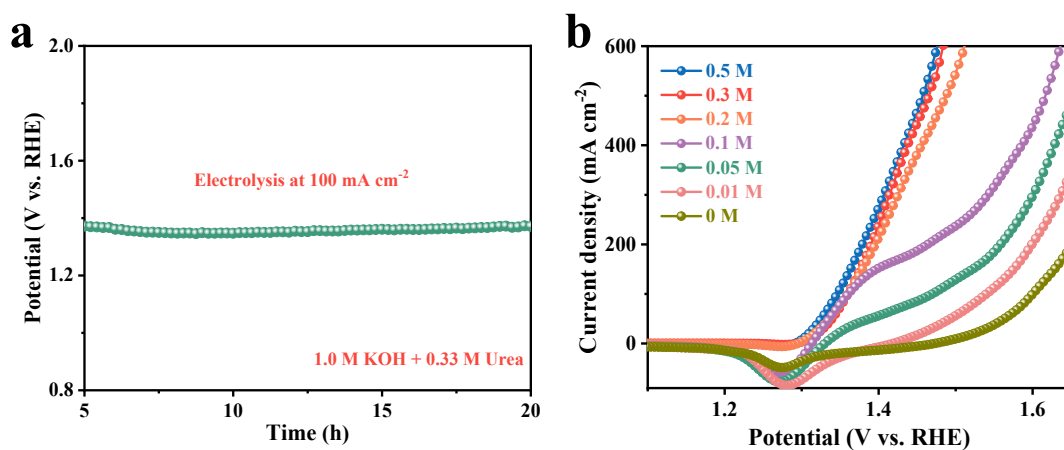

Figure S20. (a) Chronopotentiometry test of c-MoNi/a-NiMoO<sub>x</sub> in 1.0 M KOH + 0.33 M Urea. (b) UOR polarization curves of c-MoNi/a-NiMoO<sub>x</sub> with different urea contents in 1.0 M KOH.



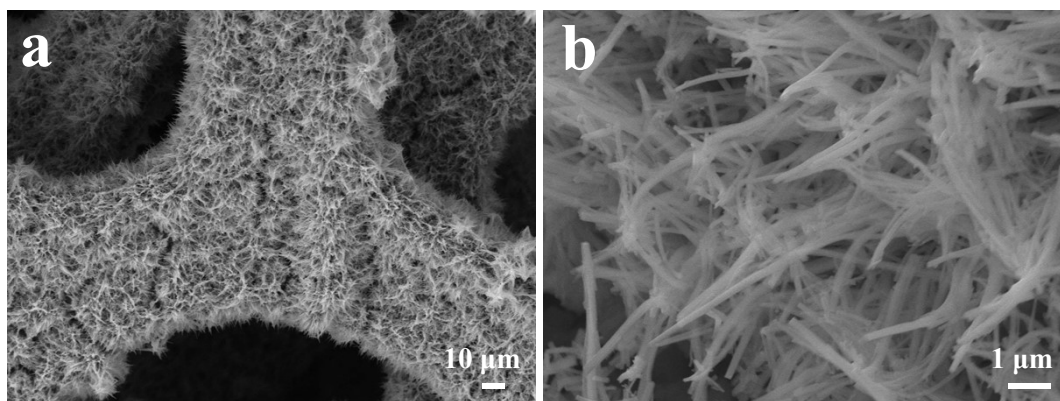

Figure S21. SEM images of the c-NiMo/a-NiMoO<sub>x</sub> catalyst after UOR test.

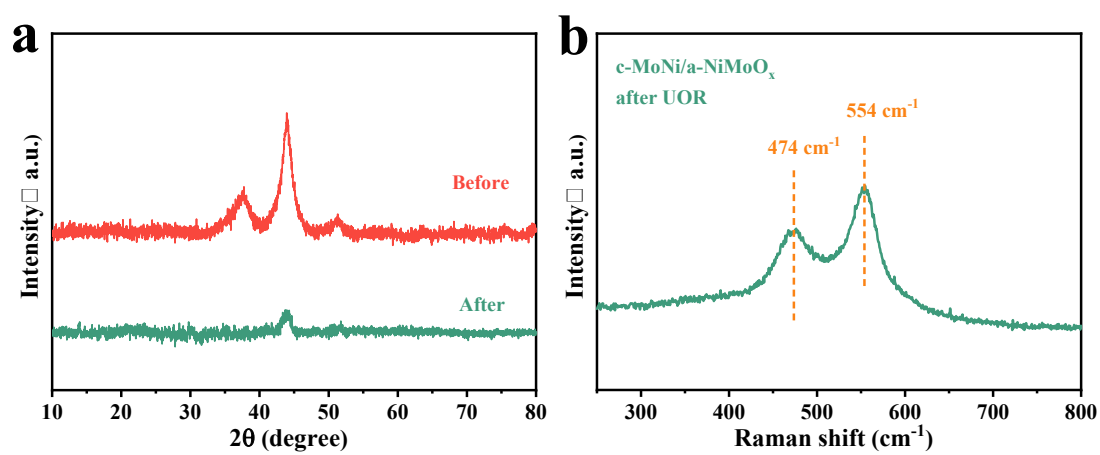

Figure S22. (a) XRD and (b) Raman patterns of c-NiMo/a-NiMoO<sub>x</sub> after UOR test.

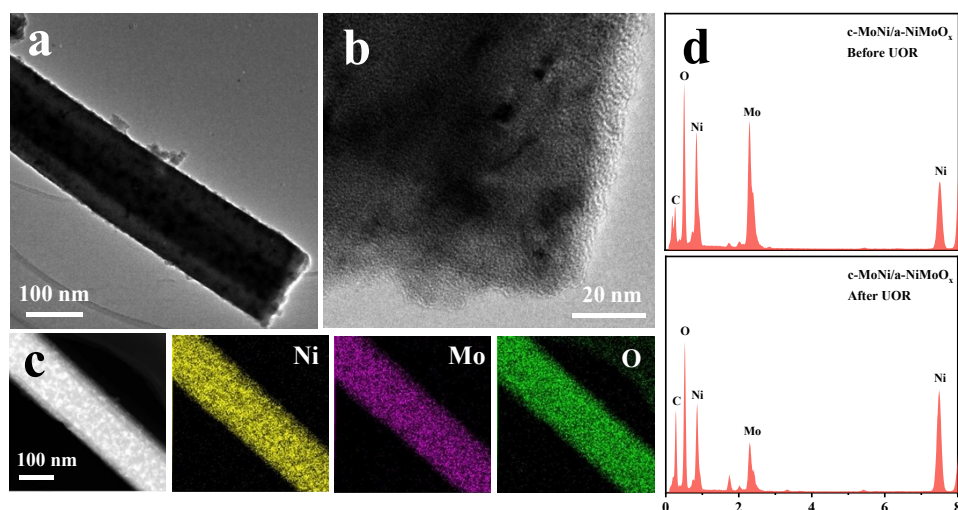

Figure S23. (a, b) TEM images at different magnifications, (c) HAADF-STEM image and corresponding elemental mappings, (d) EDS spectra of c-MoNi/a-NiMoO<sub>x</sub> after UOR test.

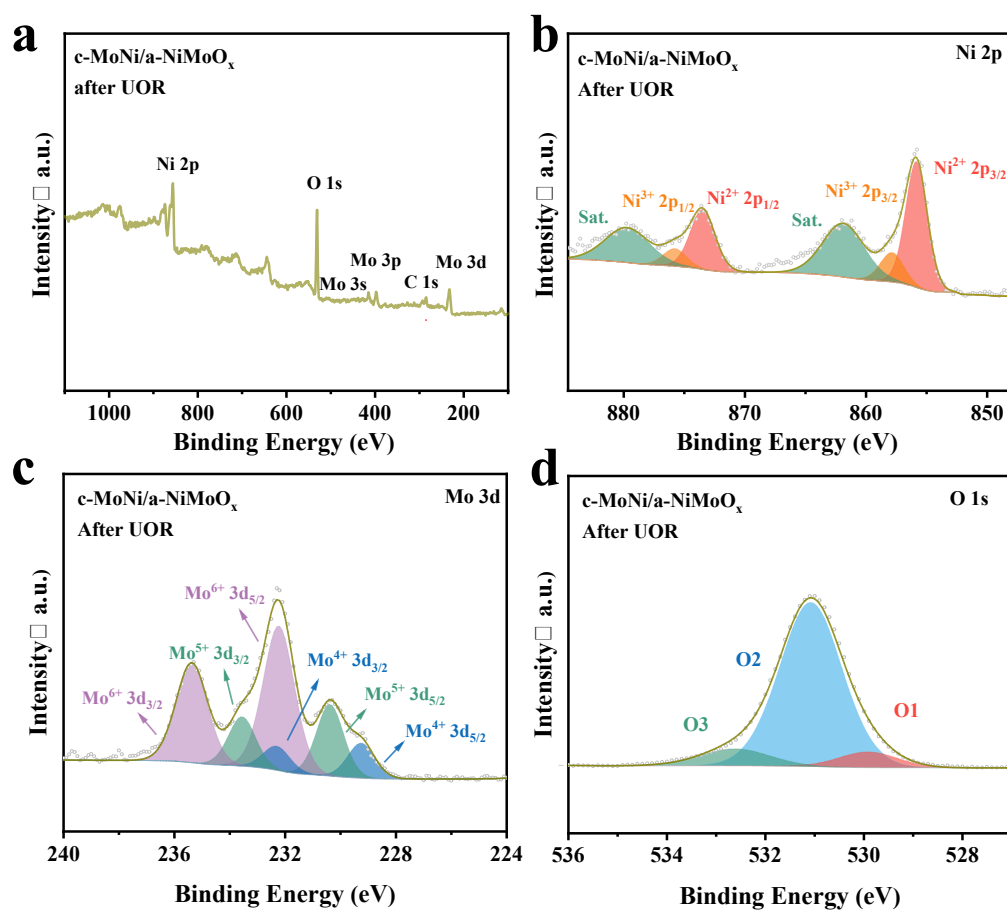

Figure S24. XPS survey spectra (a) and the high-resolution XPS spectra of (b) Ni 2p, (c) Mo 3d, and (d) O 1s of c-NiMo/a-NiMoO<sub>x</sub> after UOR test.

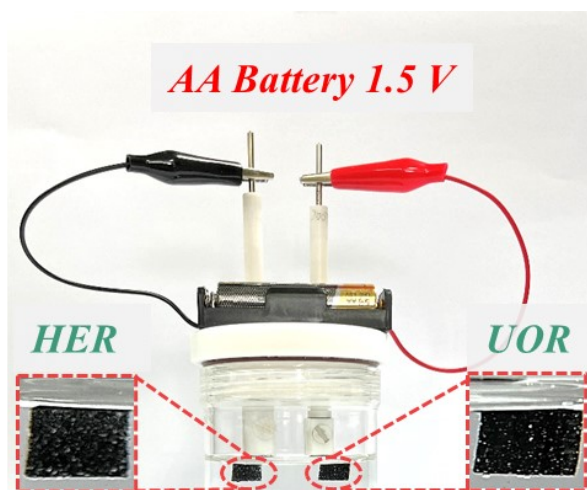

Figure S25. Diagram of urea-assisted water splitting driven by commercial AA batteries.

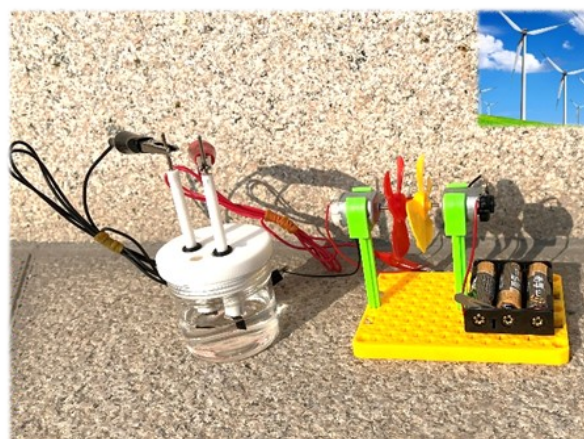

Figure S26. Diagram of urea-assisted water splitting driven by wind power.

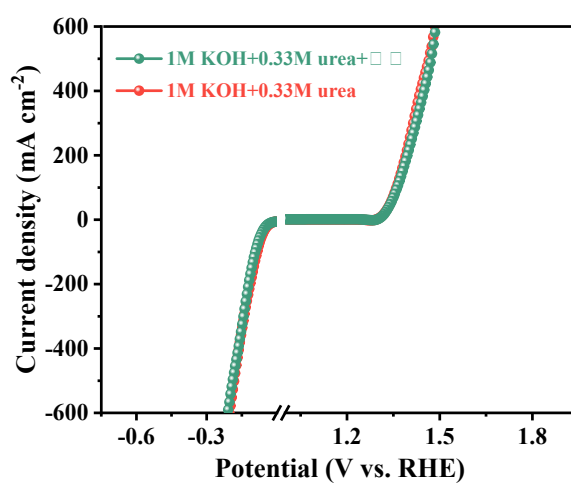

Figure S27. Comparison of HER and UOR polarization curves of c-MoNi/a-NiMoO<sub>x</sub> in 1.0 M KOH + 0.33 M Urea and 1 M KOH + 0.33 M Urea + seawater.

## Supplementary Tables

Table S1. ICP-OES data for c-MoNi/a-NiMoO<sub>x</sub>.

| Samples                     | Ni (mg/L) | Mo (mg/L) | actual Ni/Mo atomic ratio |
|-----------------------------|-----------|-----------|---------------------------|
| c-MoNi/a-NiMoO <sub>x</sub> | 6.253     | 1.014     | 1:1                       |

Table S2. Comparison of the HER activity of c-NiMo/a-NiMoO<sub>x</sub> with other reported non-noble-metal electrocatalysts in 1M KOH.  $\eta_{-10}$  is overpotentials required to achieve current densities of 10 mA cm<sup>-2</sup>.

| Catalysts                               | Electrolyte      | $\eta_{-10}$ (mV) | Reference                                            |
|-----------------------------------------|------------------|-------------------|------------------------------------------------------|
| <i>c-NiMo/a-NiMoO<sub>x</sub></i>       | <i>1.0 M KOH</i> | <i>20</i>         | <i>This work</i>                                     |
| Ni(Cu)VO <sub>x</sub>                   | 1.0 M KOH        | 21                | <i>Nat. Commun.</i> , 2020, 11, 2720.                |
| Ni <sub>2</sub> P/NiMoP                 | 1.0 M KOH        | 22                | <i>eScience</i> , 2021, 1, 69-74.                    |
| Cu <sub>0.5</sub> Ni <sub>0.5</sub>     | 1.0 M KOH        | 28                | <i>Small</i> , 2023, 19, 2300959.                    |
| Fe <sub>2</sub> P@Ni <sub>x</sub> P     | 1.0 M KOH        | 33                | <i>Chem. Eng. J.</i> , 2021, 417, 128067.            |
| Ni(OH) <sub>2</sub> -NiMoO <sub>x</sub> | 1.0 M KOH        | 36                | <i>Adv. Energy Mater.</i> , 2019, 9, 1902703.        |
| Ni <sub>2</sub> PCoCH                   | 1.0 M KOH        | 62                | <i>Angew. Chem. Int. Ed.</i> , 2023, 62, e202302795. |
| W <sub>1</sub> Mo <sub>1</sub> -NG      | 1.0 M KOH        | 67                | <i>Sci. Adv.</i> , 2020, 6, eaba6586.                |
| Co <sub>x</sub> Mo <sub>y</sub> CH      | 1.0 M KOH        | 82                | <i>J. Energ. Chem.</i> , 2022, 70, 258-265.          |
| N-WS <sub>2</sub> /Ni <sub>3</sub> FeN  | 1.0 M KOH        | 84                | <i>Small</i> , 2022, 18, 2104624.                    |
| Ni <sub>2</sub> P-NiMoO <sub>x</sub>    | 1.0 M KOH        | 91                | <i>ACS Catal.</i> , 2023, 13, 97929805.              |

|                                            |           |     |                                           |
|--------------------------------------------|-----------|-----|-------------------------------------------|
| <b>Fe-Mo-S/Ni<sub>3</sub>S<sub>2</sub></b> | 1.0 M KOH | 144 | <i>Chem. Eng. J.</i> , 2021, 404, 126483. |
|--------------------------------------------|-----------|-----|-------------------------------------------|

Table S3. Comparison of the UOR activity of c-NiMo/a-NiMoO<sub>x</sub> with other reported non-noble-metal electrocatalysts in urea-rich 1.0 M KOH.

| <b>Catalysts</b>                                     | <b>Urea concentration</b> | <b>Voltage (<math>E_{10}</math>, V)</b> | <b>Reference</b>                                     |
|------------------------------------------------------|---------------------------|-----------------------------------------|------------------------------------------------------|
| <b><i>c-NiMo/a-NiMoO<sub>x</sub></i></b>             | <b><i>0.33 M Urea</i></b> | <b><i>1.31</i></b>                      | <b><i>This work</i></b>                              |
| Ni <sub>3</sub> N/Mo <sub>2</sub> N                  | 0.33 M Urea               | 1.32                                    | <i>ACS Catal.</i> , 2023, 13, 4091-4100.             |
| Cu <sub>0.5</sub> Ni <sub>0.5</sub>                  | 0.5 M Urea                | 1.33                                    | <i>Small</i> , 2023, 2300959.                        |
| Co <sub>x</sub> Mo <sub>y</sub> CH                   | 0.33 M Urea               | 1.33                                    | <i>J. Energy Chem.</i> , 2022, 70, 258-265.          |
| Ni/W <sub>5</sub> N <sub>4</sub>                     | 0.5 M Urea                | 1.34                                    | <i>Appl. Catal. B: Environ.</i> , 2023, 323, 122168. |
| Fe <sub>2</sub> P@Ni <sub>x</sub> P                  | 0.5 M Urea                | 1.35                                    | <i>Chem. Eng. J.</i> , 2021, 417, 128067.            |
| NiSe <sub>2</sub> /MoSe <sub>2</sub>                 | 0.5 M Urea                | 1.34                                    | <i>Appl. Catal. B: Environ.</i> , 2024, 341, 123312. |
| Ni <sub>2</sub> P <sub>4</sub> O <sub>12</sub> /NiTe | 0.33 M Urea               | 1.34                                    | <i>Adv. Mater.</i> , 2024, 36, 2311766.              |
| Ni-WO <sub>x</sub>                                   | 0.33 M Urea               | 1.40                                    | <i>Angew. Chem. Int. Ed.</i> , 2021, 60, 10577.      |
| NiS/MoS <sub>2</sub> @CC                             | 0.5 M Urea                | 1.36                                    | <i>Chem. Eng. J.</i> , 2022, 443, 136321.            |
| O <sub>vac</sub> -V-Ni(OH) <sub>2</sub>              | 0.33 M Urea               | 1.47                                    | <i>Adv. Funct. Mater.</i> , 2022, 33, 2209698.       |

Table S4. Comparison of overall urea splitting performance of c-NiMo/a-NiMoO<sub>x</sub> with other reported bifunctional electrocatalysts in urea-rich 1.0 M KOH.

| Catalysts                                                        | Urea concentration        | Cell voltage ( $E_{10}$ , V) | Reference                                             |
|------------------------------------------------------------------|---------------------------|------------------------------|-------------------------------------------------------|
| <b><i>c-NiMo/a-NiMoO<sub>x</sub></i></b>                         | <b><i>0.33 M Urea</i></b> | <b><i>1.327</i></b>          | <b><i>This work</i></b>                               |
| Ni <sub>3</sub> N/Mo <sub>2</sub> N                              | 0.33 M Urea               | 1.36                         | <i>ACS Catal.</i> , 2023, 13, 4091.                   |
| Ni <sub>2</sub> P <sub>4</sub> O <sub>12</sub> /NiTe             | 0.33 M Urea               | 1.37                         | <i>Adv. Mater.</i> , 2024, 2311766.                   |
| F-NiO/Ni@C                                                       | 0.33 M Urea               | 1.37                         | <i>Adv. Funct. Mater.</i> , 2023,33, 2303986.         |
| a-RuO <sub>2</sub> /NiO                                          | 0.33 M Urea               | 1.372                        | <i>ACS Nano</i> , 2024, 18, 1214-1225.                |
| Cu <sub>0.5</sub> Ni <sub>0.5</sub>                              | 0.5 M Urea                | 1.38                         | <i>Small</i> , 2023, 19, 2300959.                     |
| Co <sub>x</sub> Mo <sub>y</sub> CH                               | 0.33 M Urea               | 1.40                         | <i>J. Energy Chem.</i> , 2022, 70, 258-265.           |
| N-Co <sub>9</sub> S <sub>8</sub> /Ni <sub>3</sub> S <sub>2</sub> | 0.5 M Urea                | 1.40                         | <i>Small</i> , 2023, 19, 2207425.                     |
| NiSe <sub>2</sub> /MoSe <sub>2</sub>                             | 0.5 M Urea                | 1.44                         | <i>Angew. Chem. Int. Ed.</i> , 2021, 60, 10577-10582. |
| NiS/MoS <sub>2</sub> @CC                                         | 0.5 M Urea                | 1.46                         | <i>Chem. Eng. J.</i> , 2022, 443, 136321.             |



## Supplementary references

- 1 G. Kresse and J. Furthmüller, *Comp. Mater. Sci.*, 1996, 6, 15-50.
- 2 G. Kresse and J. Furthmüller, *Phys. Rev. B*, 1996, 54, 11169-11186.
- 3 J. P. Perdew, K. Burke and M. Ernzerhof, *Phys. Rev. Lett.*, 1996, 77, 3865-3868.
- 4 G. Kresse and D. Joubert, *Phys. Rev. B*, 1999, 59, 1758-1775.
- 5 P. E. Blöchl, *Phys. Rev. B*, 1994, 50, 17953-17979.
- 6 S. L. Dudarev, G. A. Botton, S. Y. Savrasov, C. J. Humphreys and A. P. Sutton,  
*Phys. Rev. B*, 1998, 57, 1505-1509.
- 7 S. Grimme, J. Antony, S. Ehrlich and H. Krieg, *J. Chem. Phys.*, 2010, 132,  
154104.
